RESEARCH ARTICLE

# Vomiting as a Symptom and Transmission Risk in Norovirus Illness: Evidence from Human Challenge Studies

Amy E. Kirby\*, Ashleigh Streby, Christine L. Moe

Hubert Department of Global Health, Rollins School of Public Health, Emory University, Atlanta, GA, United States of America

\* [aekirby@emory.edu](mailto:aekirby@emory.edu)

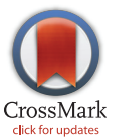

## Abstract

### Background

In the US, noroviruses are estimated to cause 21 million cases annually with economic losses reaching \$2 billion. Outbreak investigations frequently implicate vomiting as a major transmission risk. However, little is known about the characteristics of vomiting as a symptom or the amount of virus present in emesis.

### Methodology and Principal Findings

Emesis samples and symptomology data were obtained from previous norovirus human challenge studies with GI.1 Norwalk virus, GII.2 Snow Mountain virus, and a pilot study with GII.1 Hawaii virus. Viral titers in emesis were determined using strain-specific quantitative RT-PCR. In all four studies, vomiting was common with 40–100% of infected subjects vomiting at least once. However, only 45% of subjects with vomiting also had diarrhea. Most of the emesis samples had detectable virus and the mean viral titers were  $8.0 \times 10^5$  and  $3.9 \times 10^4$  genomic equivalent copies (GEC)/ml for GI and GII viruses, respectively ( $p = 0.02$ ). Sample pH was correlated with GII.2 Snow Mountain virus detection.

### Conclusions and Significance

Half of all subjects with symptomatic infection experienced vomiting and the average subject shed  $1.7 \times 10^8$  GEC in emesis. Unlike shedding through stool, vomiting is more likely to result in significant environmental contamination, leading to transmission through fomites and airborne droplets. This quantitative data will be critical for risk assessment studies to further understand norovirus transmission and develop effective control measures. The correlation between sample pH and virus detection is consistent with a single site of virus replication in the small intestine and stomach contents becoming contaminated by intestinal reflux. Additionally, the frequency of vomiting without concurrent diarrhea suggests that epidemiology studies that enroll subjects based on the presence of diarrhea may be significantly underestimating the true burden of norovirus disease.

## OPEN ACCESS

**Citation:** Kirby AE, Streby A, Moe CL (2016) Vomiting as a Symptom and Transmission Risk in Norovirus Illness: Evidence from Human Challenge Studies. PLoS ONE 11(4): e0143759. doi:10.1371/journal.pone.0143759

**Editor:** Xiang-Jin Meng, Virginia Polytechnic Institute and State University, UNITED STATES

**Received:** August 14, 2015

**Accepted:** November 9, 2015

**Published:** April 26, 2016

**Copyright:** © 2016 Kirby et al. This is an open access article distributed under the terms of the [Creative Commons Attribution License](https://creativecommons.org/licenses/by/4.0/), which permits unrestricted use, distribution, and reproduction in any medium, provided the original author and source are credited.

**Data Availability Statement:** The study dataset has been uploaded to Dryad (doi:10.5061/dryad.sk800).

**Funding:** This work was supported by the Agriculture and Food Research Initiative Competitive grant no. 2011-68003-30395 from the US Department of Agriculture, National Institute of Food and Agriculture through the NoroCORE project. The funders had no role in study design, data collection and analysis, decision to publish, or preparation of the manuscript.

**Competing Interests:** The authors have declared that no competing interests exist.

## Introduction

Noroviruses are estimated to cause 21 million cases of acute gastroenteritis every year in the US [1]. Although most cases of AGE are self-limiting, it is estimated that up to 71,000 cases are hospitalized and 510–800 deaths occur annually [1]. Two genogroups of norovirus, GI and GII, are responsible for the majority of human disease [2]. These genogroups are further divided into 9 and 21 genotypes, respectively. A meta-analysis of published norovirus outbreaks observed that GI viruses are more frequently associated with environmental transmission and GII viruses are more likely to be associated with person-to-person transmission and healthcare-associated outbreaks [3]. Currently, there is no specific treatment for norovirus, though a bi-valent GI.1, GII.4 vaccine is in development [3].

Noroviruses are transmitted through the fecal-oral route via consumption of contaminated food or water, contact with contaminated surfaces (fomites), and person-to-person [4–10]. Outbreak investigations have implicated vomiting events as a significant contributor to transmission risk, either by contamination of surfaces or creation of aerosols that can be inhaled through the mouth [8, 11–19]. Marks et al. investigated a large outbreak in an elementary school and found that risk of norovirus illness increased with each vomiting event that occurred in a classroom [14]. Proximity to a vomiting event has also been shown to correlate with attack rates [13, 19]. In several instances, the contamination from the initial vomiting event continued to cause infections for several days and, in some cases, after cleaning [8, 15, 19].

Despite the clear role of vomiting in transmission, there is very little data on viral loads in emesis. An investigation of norovirus outbreaks among rafters in the Grand Canyon detected GI norovirus in a vomitus sample [20]. In samples collected during a GI.1 Norwalk virus human challenge trial, 56% of emesis samples had detectable virus and the median titer was  $4.1 \times 10^4$  gEq/ml [21]. There is no data available for the more common GII noroviruses.

The goal of this study is to provide quantitative data describing the frequency of vomiting and virus titers during norovirus infection. We analyzed vomiting data from two GI.1 Norwalk virus challenge studies, a GII.2 Snow Mountain virus challenge and a pilot study with GII.1 Hawaii virus. Virus titers were determined by RT-qPCR in the archived emesis samples from these studies. The availability of this data will facilitate accurate transmission risk estimation and provide an evidence base for the development of appropriate control measures, such as disinfection after a public vomiting event.

## Methods

### Human Challenge Studies

The emesis samples for this study are archived specimens from three previously published human challenge studies (GI.1 Norwalk 8fIIb and GII.2 Snow Mountain Virus) [22–24] and one pilot study (GII.1 Hawaii Virus). Dosing schemes for each study are given in Table 1. Briefly, healthy adult subjects were admitted to the hospital research unit on Day 0. After providing a pre-challenge stool sample, the subjects were challenged with safety-tested norovirus inoculum that was suspended in water ([23, 24] and Hawaii virus (pilot)) or injected into raw oysters [22]. The subjects were kept in isolated hospital rooms for 5 days post-challenge. Symptoms were assessed by study staff at least twice each day. Anti-emetics were offered to subjects in all studies if excessive vomiting posed a risk of dehydration. During the inpatient period, all stools and emesis samples were collected for virus testing, and the time of collection was recorded. No subjects reported vomiting after discharge from the research unit, nor did any uninfected subjects experience vomiting.

**Table 1. Human Challenge Studies Contributing Samples to This Study.**

| Study        | Strain              | Dose (GEC <sup>a</sup> ) | Delivery | # Enrolled | # Infected <sup>b</sup> | # Ill <sup>c</sup> (%) | # With Vomiting (%) | Reference  |
|--------------|---------------------|--------------------------|----------|------------|-------------------------|------------------------|---------------------|------------|
| Genogroup I  |                     |                          |          |            |                         |                        |                     |            |
| 1            | GI.1 Norwalk 8fllb  | ≤ 1 x 10 <sup>4</sup>    | Oyster   | 54         | 15                      | 10 (67)                | 6 (40)              | [22]       |
| 2            | GI.1 Norwalk 8fllb  | ≤ 6.5x10 <sup>7</sup>    | Water    | 13         | 10                      | 10 (100)               | 8 (80)              | [24]       |
| Genogroup II |                     |                          |          |            |                         |                        |                     |            |
| 3            | GII.2 Snow Mountain | ≤ 1.2x10 <sup>5</sup>    | Water    | 15         | 9                       | 9 (100)                | 6 (67)              | [23]       |
| 4            | GII.1 Hawaii        | 8.0x10 <sup>6</sup>      | Water    | 2          | 2                       | 2 (100)                | 2 (100)             | This study |

<sup>a</sup> Genomic equivalent copies.

<sup>b</sup> Defined as detection of norovirus RNA in at least one stool or ≥ 4-fold rise in anti-norovirus IgG in serum.

<sup>c</sup> Defined as diarrhea (alone) or one or more vomiting episodes plus one of the following: abdominal cramps, nausea, fever (oral temperature ≥37.6°C), myalgia, chills, fatigue, or headache.

doi:10.1371/journal.pone.0143759.t001

Emesis and stool samples were weighed, aliquoted into sterile containers and frozen at -80°C. For emesis samples, weight was used as a proxy for total volume with 1 g equal to 1 ml. Samples collected within 15 min of each other were combined and treated as a single specimen occurring at the earlier recorded time.

Infection was defined as detection of norovirus RNA in at least one stool specimen or ≥ 4-fold increase in anti-norovirus IgG in serum. Diarrhea was defined as ≥ 3 unformed stools or ≥400 g unformed stool in a 24 hr period. Viral gastroenteritis was defined as detection of norovirus RNA in stool, and diarrhea (alone) or one or more vomiting episodes plus one of the following: abdominal cramps, nausea, fever (oral temperature ≥37.6°C), myalgia, chills, fatigue, or headache.

All challenge studies were approved by the Emory University Institutional Review Board (studies 1 and 2) [22, 24] or the University of North Carolina Institutional Review Board (studies 3 and 4) [23]. All subjects provided written consent for study participation and future use of study specimens. Studies 1 and 2 are registered at clinicaltrials.gov (trials NCT00674336 and NCT00313404, respectively). Studies 3 and 4 were completed prior to mandatory trials registration.

### RNA Isolation

Emesis (50% vol/vol) and stool (20% vol/vol) suspensions were prepared in sterile, molecular-grade water. For emesis specimens, only the liquid phase of the specimen was used to maintain testing consistency. Virus particles were separated from organic debris by phase extraction with an equal volume of Vertrel XF (DuPont, Wilmington, DE). After incubating for 2 hours at 4°C, the sample was centrifuged for 10 minutes at 9400 x g. RNA was isolated from 140 µl of the aqueous phase using the QiaAmp Viral RNA mini kit (Qiagen, Valencia, CA) following the manufacturer’s instructions. Isolated RNA was stored at -20°C until testing.

### Quantification of Viral Copies

Viral titers were determined using quantitative reverse transcription polymerase chain reaction (qRT-PCR) using previously described strain-specific primers and probes and the OneStep RT-PCR kit (Qiagen, Valencia, CA) [25, 26]. The Snow Mountain virus primers were used to test Hawaii virus samples, as the primer and probe target sequences are identical between the two strains. In vitro-transcribed Norwalk or Snow Mountain RNA standards were used to generate standard curves, which were used to estimate genomic equivalent copies (GEC) per well.

The assays were performed on a BioRad CFX96 Real-Time PCR Detection System (Bio-Rad Laboratories, Hercules, CA) with the cycling program: 50°C for 32 min, 95°C for 10 min, 45 cycles of 95°C for 15 sec followed by 56°C for 1 min. The final titers were reported as GEC/ml for emesis and GEC/g for stool.

## pH Determination

The pH of completely thawed emesis samples was determined using pHDrion plastic pH strips, 0.0 to 6.0 (Micro Essential Laboratory, Brooklyn, NY) and colorPHast pH strips, 5–10 (EMD Millipore, Billerica, MA).

## Statistical Analyses

Comparisons between studies and between genogroups were assessed using the Student's *t*-test. ANOVA was carried out in GraphPad Prism 6 (GraphPad Software, Inc., La Jolla, CA).

## Results

The samples used in this study were archived from previous norovirus human challenge trials ([Table 1](#)). Of the 25 subjects infected with Norwalk virus, 20 became ill and 14 vomited at least once. The earliest vomiting episode was 20 hrs post-challenge. In both of the Norwalk virus studies, the challenge dose was treated prior to administration; the oysters were subjected to high-pressure hydrostatic processing and the spiked groundwater was stored at room temperature for varying times. Thus, it is not possible to know the exact dose of active virus in each challenge, only the upper limit which is reported in [Table 1](#). Fifteen subjects were challenged with one of three doses of Snow Mountain virus, 9 became ill and 6 vomited. There was no relationship between dose and vomiting (data not shown). The pilot infectivity study of Hawaii virus only had two subjects, but both became ill and vomited. Due to the small sample size, only descriptive results are presented for Hawaii virus and the data was not included when comparing results between genogroups. There were a total of 57 archived emesis samples available from 22 subjects for this study. None of the uninfected subjects in any of the studies experienced vomiting.

Vomiting is very common in symptomatic norovirus infection. Among subjects infected with Norwalk virus, 70% of symptomatic subjects experienced at least one vomiting event ([Table 1](#)). Similarly, 72% of symptomatic subjects infected with one of the GII viruses experienced vomiting. Vomiting was of short duration; the mean time between first and last vomiting events ranged from 2.0 to 10.8 hr ([Table 2](#)). The number of vomiting events ranged from 1 to 7, with 32% of subjects only vomiting once. On average, subjects produced 658.7 ml and 845.0 ml of emesis over the course of their illness with GI.1 Norwalk virus or GII.2 Snow Mountain virus, respectively. Among subjects infected with GI norovirus, 57% of vomiting subjects also met the study definition of diarrhea ( $\geq 3$  loose stools or  $\geq 400$ g loose stool in 24 hr). Among subjects infected with GII norovirus, 50% of vomiting subjects also had diarrhea. There were no statistically significant differences in vomiting frequency, duration, volume or diarrhea frequency between GI Norwalk virus (studies 1 and 2) and GII Snow Mountain virus (study 3) infections.

Most subjects who experienced vomiting had at least one sample with detectable norovirus ([Table 3](#)). Of the subjects who only vomited once, none had detectable virus in their emesis sample. In contrast, when subjects experienced multiple vomiting events, the first vomiting event was often norovirus-positive (57%, [Fig 1](#)). There was no difference in viral titers between GI.1 Norwalk virus and GII.2 Snow Mountain virus samples ( $8.0 \times 10^5$  GEC/ml vs.  $1.6 \times 10^5$  GEC/ml,  $p = 0.36$ ). Samples from subjects infected with Hawaii virus had lower mean virus titers but a higher frequency of positive samples. To assess total viral shedding in emesis,

**Table 2. Characteristics of Vomiting as a Symptom.**

| Study  | N  | Vomiting Events/<br>Subject |      | Mean Duration <sup>a</sup> (hrs)(SEM <sup>e</sup> ) | Mean Volume/Subject (ml)(SEM <sup>e</sup> ) | Frequency of Concurrent Diarrhea <sup>b</sup> |
|--------|----|-----------------------------|------|-----------------------------------------------------|---------------------------------------------|-----------------------------------------------|
|        |    | Min, Max                    | Mode |                                                     |                                             |                                               |
| 1      | 6  | 1, 7                        | 1    | 4.9 (3.1)                                           | 489.2 (206.6)                               | 67%                                           |
| 2      | 8  | 1, 5                        | 1,3  | 9.7 (6.2)                                           | 785.8 (111.5)                               | 50%                                           |
| All GI | 14 | 1, 7                        | 1    | 7.7 (3.7)                                           | 658.7 (111.9)                               | 57%                                           |
| 3      | 6  | 1, 4                        | 1,2  | 2.0 (0.8)                                           | 845.0 (226.7) <sup>c</sup>                  | 50%                                           |
| 4      | 2  | 4, 6                        | -    | 10.8 (2.1)                                          | 1439.0 (ND) <sup>d</sup>                    | 50%                                           |

<sup>a</sup> For subjects with only one vomiting event, a duration of 1 minute was assigned.

<sup>b</sup> Diarrhea was defined as  $\geq 3$  loose stools or  $\geq 400$ g loose stool produced in 24 hours.

<sup>c</sup> Two subjects were missing volume data and are not included in this analysis.

<sup>d</sup> One subject was missing volume data and is not included in this analysis.

<sup>e</sup> Standard error of the mean.

doi:10.1371/journal.pone.0143759.t002

cumulative shedding was calculated by multiplying the sample virus titer by the sample volume in ml and summing the resulting value across all positive samples for a subject. Overall, the cumulative virus shedding per subject was high ( $1.8 \times 10^8$  GEC  $\pm 7.8 \times 10^7$ , Norwalk and Snow Mountain viruses only). The cumulative shedding titers for subjects infected with Norwalk or Snow Mountain viruses were similar, but the cumulative shedding during Hawaii virus infection was 2–3 logs lower than the other viruses ( $2.3 \times 10^5$ ). However, it should be noted that only one subject infected with Hawaii virus had sample volume data available.

The relationship between virus titers in emesis and stool from representative subjects is shown in Fig 2. In all four studies, viral titers in emesis were lower than those in stool. Most subjects did not have stool and emesis samples during the same time period, making statistical analysis of correlations in titer problematic. However, viral titers in emesis tended to increase at the same rate as the titers in stool, though not to the same magnitude.

The pH of stomach contents can vary based on diet, time of day and prolonged vomiting [27]. To assess the impact of this change on viral titers, the pH of the emesis samples was determined. There was a significant difference in the pH of samples where virus was detected and samples without any virus detected (one-way ANOVA,  $p < 0.0001$ ). There was a trend towards

**Table 3. Norovirus Titers in Emesis.**

| Study  | # Subjects with Emesis Specimens | # Emesis Specimens | % Subjects with $\geq 1$ Positive Emesis | % Positive Samples | Sample Mean Titer <sup>c</sup> (GEC <sup>d</sup> /ml)(SEM <sup>e</sup> ) | Subject Mean Cumulative Shed (GEC <sup>d</sup> )(SEM <sup>e</sup> ) |
|--------|----------------------------------|--------------------|------------------------------------------|--------------------|--------------------------------------------------------------------------|---------------------------------------------------------------------|
| 1      | 6                                | 16                 | 50%                                      | 63%                | $5.8 \times 10^5$ ( $2.6 \times 10^5$ )                                  | $1.3 \times 10^8$ ( $9.1 \times 10^7$ )                             |
| 2      | 8                                | 20                 | 75%                                      | 90%                | $9.2 \times 10^5$ ( $3.1 \times 10^5$ )                                  | $3.1 \times 10^8$ ( $1.7 \times 10^8$ )                             |
| All GI | 14                               | 36                 | 64%                                      | 78%                | $8.0 \times 10^5$ ( $2.2 \times 10^5$ )                                  | $2.3 \times 10^8$ ( $1.0 \times 10^8$ )                             |
| 3      | 4 <sup>a</sup>                   | 8                  | 25%                                      | 38%                | $1.6 \times 10^5$ ( $4.5 \times 10^4$ )                                  | $1.8 \times 10^7$ ( $1.8 \times 10^7$ )                             |
| 4      | 2                                | 13                 | 100%                                     | 92%                | $5.0 \times 10^3$ ( $2.7 \times 10^3$ )                                  | $2.3 \times 10^5$ (ND) <sup>b</sup>                                 |

<sup>a</sup> Two subjects with vomiting excluded due to missing samples.

<sup>b</sup> One subject excluded due to missing volume data.

<sup>c</sup> Of samples with detectable virus.

<sup>d</sup> Genomic equivalent copies.

<sup>e</sup> Standard error of the mean.

doi:10.1371/journal.pone.0143759.t003

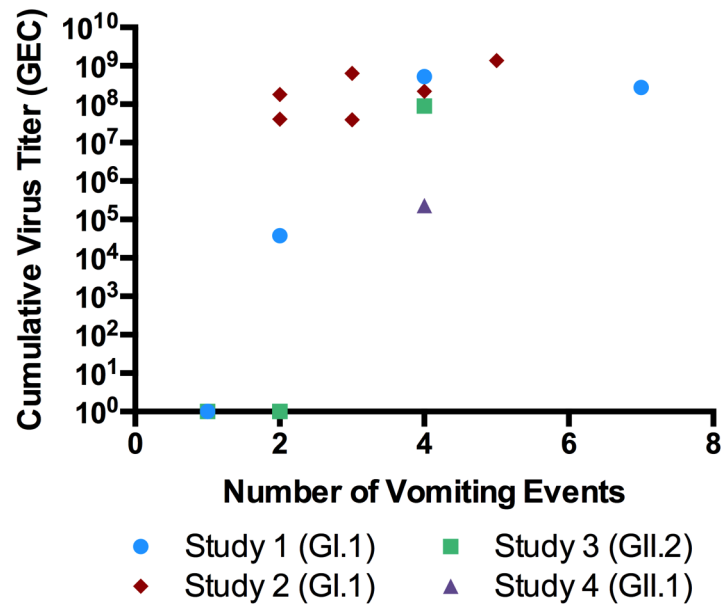

**Fig 1. Subjects With More Vomiting Events Have Higher Cumulative Virus Titers.** Cumulative virus titers are calculated by multiplying each sample’s virus titer by the sample volume and summing across all of the emesis samples from a subject. Vomiting events occurring within 15 minutes were considered a single event and the samples were combined for analysis. Each point represents a unique challenge subject, except at the baseline where multiple points overlap. Seven subjects vomited once and virus was not detected in any of those samples. Two subjects vomited twice and both samples were negative for virus.

doi:10.1371/journal.pone.0143759.g001

higher sample pH in samples with detectable virus. There was poor correlation between sample pH and viral titer.

### Discussion

It is clear from outbreak and challenge studies that vomiting is the signature symptom of norovirus infection, which is colloquially known as the “winter vomiting disease.” However, vomiting has been largely overlooked in the quantitative studies of norovirus disease. This is the first report of vomiting frequency and viral titers from human challenge studies with GI and GII noroviruses. In these challenge studies, vomiting was more prevalent than diarrhea as a symptom and norovirus-infected subjects shed large amounts of virus through vomiting. There was no difference in viral titers in emesis samples between subjects infected with GI.1 Norwalk and subjects infected with GII.2 Snow Mountain virus. (Table 3), in contrast to the titers in stool where subjects with Norwalk virus infections had higher titers [25]. Even with sample volume taken into account, there was no difference in mean cumulative virus shedding between GI and GII infections. Given the low infectious dose for Norwalk virus [21, 28], a single vomiting event could contain sufficient virus to infect over 150,000 individuals. However, the true infectivity may be over-estimated due to the detection of non-infectious virus in the RT-qPCR analysis. At this time, there is no in-vitro infectivity assay for human norovirus.

Simulated vomiting events have shown that a single vomiting event can contaminate a large area (7.8 m<sup>2</sup>) and produce potentially infectious aerosols [29, 30]. A recent study found that norovirus can survive in simulated emesis in suspension and on surfaces for up to 42 days [31]. Thus, it is critical to respond swiftly and appropriately to a vomiting event with thorough cleaning and disinfection with a chlorine-based disinfectant. Additionally, isolation and anti-emetic treatment should be implemented at the first episode of vomiting to limit the potential



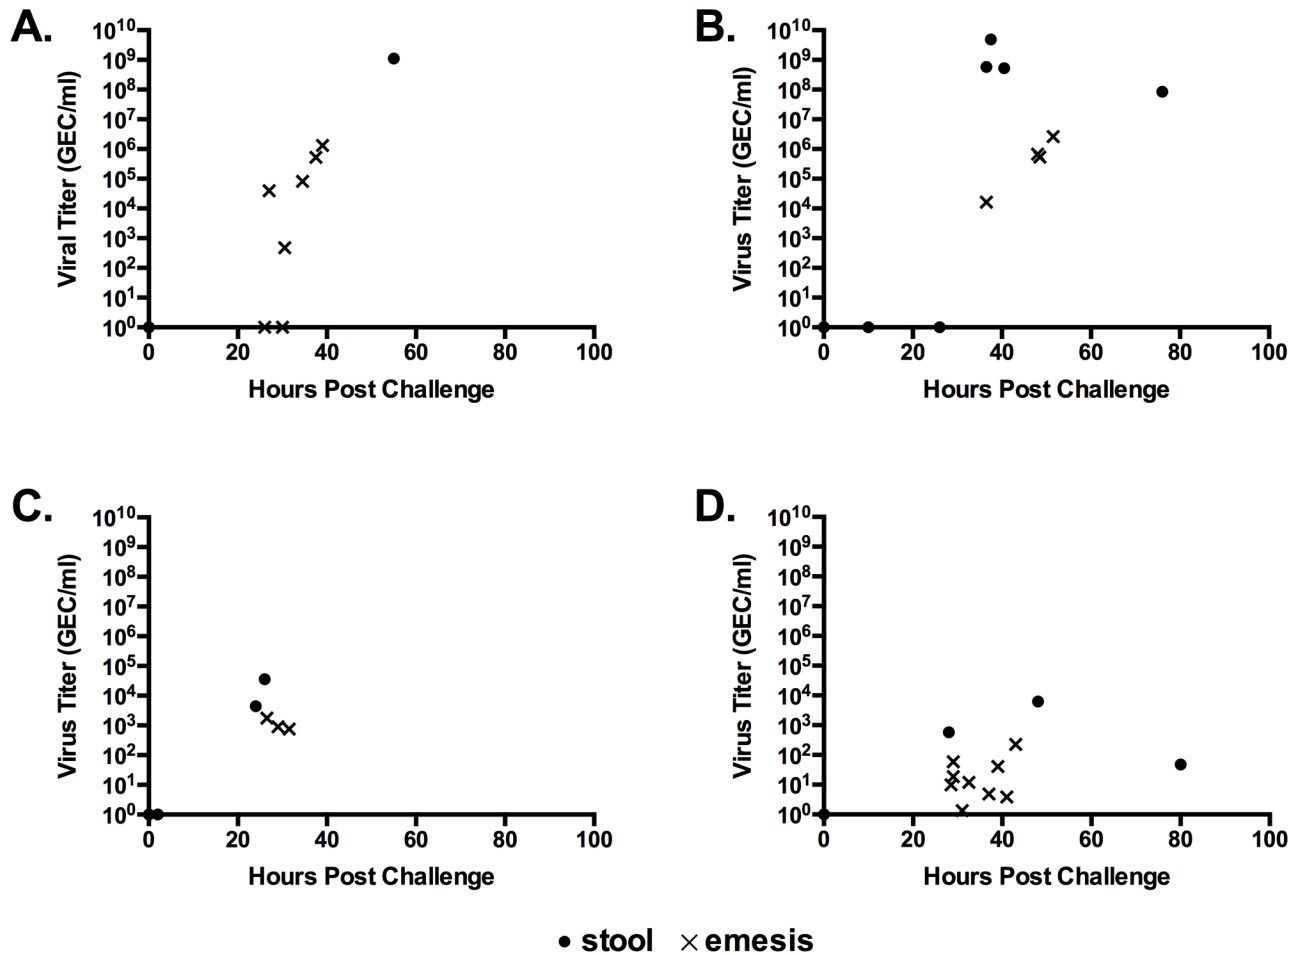

**Fig 2. Viral Titers in Emesis and Stool from Representative Challenge Subjects.** Selected subjects provided stool and emesis samples during the first 100 hours after challenge, allowing comparisons of stool and emesis viral titers in the same timeframe. Panels A and B are from subjects in study 1 infected with GI.1 Norwalk virus. Panel C is a subject in study 3 infected with GII.2 Snow Mountain virus. Panel D is a subject in study 4 infected with GII.1 Hawaii virus.

doi:10.1371/journal.pone.0143759.g002

for environmental contamination and transmission. This is particularly important because viral titers tend to increase with each additional vomiting episode (Fig 1).

This is the first report of results from a human challenge study with GII.1 Hawaii virus. The viral titers in emesis and stool (Table 2 and Fig 2) were several logs lower than those reported for other challenge inocula [21, 25], yet the subjects experienced severe vomiting and diarrhea. These results suggest that Hawaii virus may be more virulent than the other inoculum strains. However, this was a pilot study with only two subjects. More research is needed to further elucidate the clinical course and pathogenesis of Hawaii virus.

The site of norovirus replication within the host is not known, but the virus has been shown to bind to duodenal tissue [32]. The results of this study are consistent with a single site of virus replication in the duodenum or liver, as suggested by Karst and Wobus [33]. For subjects with overlapping stool and emesis specimens, the virus titers in emesis were consistently lower than those in stool, but the rate of titer increase in the two sample types was similar (Fig 2), as would be expected from a shared replication site. Additionally, there was a trend towards higher pH in samples with detectable virus (Fig 3), consistent with reflux of duodenal contents into the stomach. Like prolonged vomiting, diet and time of day can also cause an

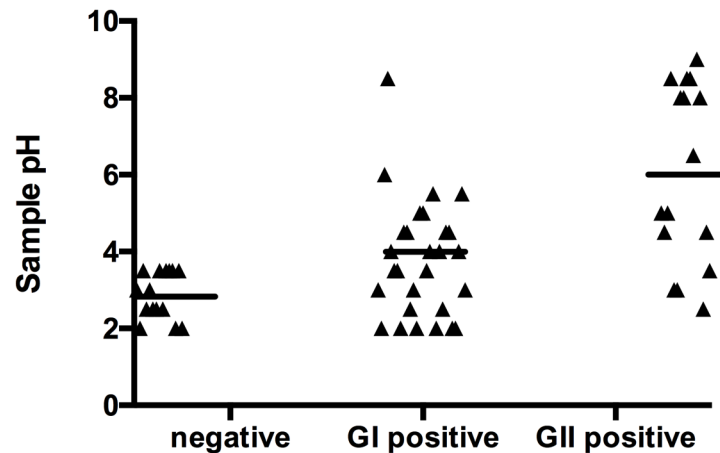

**Fig 3. Correlation Between Sample pH and Detection of Virus.** GI positive samples are from studies 1 and 2, both GI.1 Norwalk virus. GII positive samples are from studies 3 and 4, GII.2 Snow Mountain virus and GII.1 Hawaii virus, respectively. Negative samples is a compilation of negative samples from all four studies.

doi:10.1371/journal.pone.0143759.g003

increase in stomach pH [27] and may have increased the pH of early vomiting events, making the detection of significant changes in pH more unlikely. However, emesis samples were produced during the day and night and there was no correlation between time of production and sample pH (data not shown). Diet was not controlled or recorded during the challenge studies, so it is not possible to assess its impact on sample pH.

Many outbreak and epidemiology studies of norovirus define a case based on the presence of diarrhea. However, in this study, nearly half of subjects who experienced vomiting did not have concurrent diarrhea (Table 2). Our findings suggest that the diarrhea-only case definition will result in a significant underestimate of the true prevalence of norovirus disease and misclassification bias in case-control studies. Future studies should include vomiting as part of the case definition to reflect the full clinical presentation of symptomatic norovirus illness.

### Author Contributions

Conceived and designed the experiments: AEK AS CLM. Performed the experiments: AS. Analyzed the data: AEK AS. Contributed reagents/materials/analysis tools: CLM. Wrote the paper: AEK.

### References

- Hall AJ, Lopman BA, Payne DC, Patel MM, Gastanaduy PA, Vinje J, et al. Norovirus disease in the United States. *Emerg Infect Dis.* 2013; 19(8):1198–205. doi: [10.3201/eid1908.130465](https://doi.org/10.3201/eid1908.130465) PMID: [23876403](https://pubmed.ncbi.nlm.nih.gov/23876403/); PubMed Central PMCID: PMCPMC3739528.
- Ramani S, Atmar RL, Estes MK. Epidemiology of human noroviruses and updates on vaccine development. *Curr Opin Gastroenterol.* 2014; 30(1):25–33. doi: [10.1097/MOG.000000000000022](https://doi.org/10.1097/MOG.000000000000022) PMID: [24232370](https://pubmed.ncbi.nlm.nih.gov/24232370/); PubMed Central PMCID: PMCPMC3955997.
- Bernstein DI, Atmar RL, Lyon GM, Treanor JJ, Chen WH, Jiang X, et al. Norovirus vaccine against experimental human GII.4 virus illness: a challenge study in healthy adults. *J Infect Dis.* 2015; 211(6):870–8. doi: [10.1093/infdis/jiu497](https://doi.org/10.1093/infdis/jiu497) PMID: [25210140](https://pubmed.ncbi.nlm.nih.gov/25210140/).
- Bernard H, Faber M, Wilking H, Haller S, Hohle M, Schielke A, et al. Large multistate outbreak of norovirus gastroenteritis associated with frozen strawberries, Germany, 2012. *Euro Surveill.* 2014; 19(8):20719. PMID: [24602278](https://pubmed.ncbi.nlm.nih.gov/24602278/).
- Muller L, Schultz AC, Fonager J, Jensen T, Lisby M, Hindsdal K, et al. Separate norovirus outbreaks linked to one source of imported frozen raspberries by molecular analysis, Denmark, 2010–2011. *Epidemiol Infect.* 2015; 143(11):2299–307. doi: [10.1017/S0950268814003409](https://doi.org/10.1017/S0950268814003409) PMID: [25530074](https://pubmed.ncbi.nlm.nih.gov/25530074/).



6. Polkowska A, Ronnqvist M, Lepisto O, Roivainen M, Maunula L, Huusko S, et al. Outbreak of gastroenteritis caused by norovirus GII.4 Sydney variant after a wedding reception at a resort/activity centre, Finland, August 2012. *Epidemiology and Infection*. 2014; 142(9):1877–83. doi: [10.1017/S0950268813002847](https://doi.org/10.1017/S0950268813002847) WOS:000340249200010. PMID: [24229743](https://pubmed.ncbi.nlm.nih.gov/24229743/)
7. Sartorius B, Andersson Y, Velicko I, De Jong B, Lofdahl M, Hedlund KO, et al. Outbreak of norovirus in Vastra Gotaland associated with recreational activities at two lakes during August 2004. *Scand J Infect Dis*. 2007; 39(4):323–31. doi: [10.1080/00365540601053006](https://doi.org/10.1080/00365540601053006) WOS:000246078800006. PMID: [17454896](https://pubmed.ncbi.nlm.nih.gov/17454896/)
8. Thornley CN, Emslie NA, Sprott TW, Greening GE, Rapana JP. Recurring norovirus transmission on an airplane. *Clin Infect Dis*. 2011; 53(6):515–20. doi: [10.1093/cid/cir465](https://doi.org/10.1093/cid/cir465) PMID: [21836128](https://pubmed.ncbi.nlm.nih.gov/21836128/)
9. Wiksw M. Outbreaks of Acute Gastroenteritis Transmitted by Person-to-Person Contact—United States, 2009–2010. *Am J Public Health*. 2014; 104(11):E13–E4. WOS:000347184400008. doi: [10.2105/AJPH.2014.10411e13](https://doi.org/10.2105/AJPH.2014.10411e13) PMID: [25295609](https://pubmed.ncbi.nlm.nih.gov/25295609/)
10. Zlot A, Simckes M, Vines J. Norovirus Outbreak Associated with a Natural Lake Used for Recreation—Oregon, 2014 (vol 68, pg 485, 2014). *Mmwr-Morbidity and Mortality Weekly Report*. 2015; 64(22):621–. WOS:000356972700007.
11. Hoefnagel J, van de Weerd D, Schaefer O, Koene R. A norovirus outbreak triggered by copper intoxication on a coach trip from the Netherlands to Germany, April 2010. *Euro Surveill*. 2012; 17(9). PMID: [22401566](https://pubmed.ncbi.nlm.nih.gov/22401566/).
12. Lopman B, Gastanaduy P, Park GW, Hall AJ, Parashar UD, Vinje J. Environmental transmission of norovirus gastroenteritis. *Curr Opin Virol*. 2012; 2(1):96–102. doi: [10.1016/j.coviro.2011.11.005](https://doi.org/10.1016/j.coviro.2011.11.005) PMID: [22440972](https://pubmed.ncbi.nlm.nih.gov/22440972/).
13. Marks PJ, Vipond IB, Carlisle D, Deakin D, Fey RE, Caul EO. Evidence for airborne transmission of Norwalk-like virus (NLV) in a hotel restaurant. *Epidemiol Infect*. 2000; 124(3):481–7. PMID: [10982072](https://pubmed.ncbi.nlm.nih.gov/10982072/); PubMed Central PMCID: PMC2810934.
14. Marks PJ, Vipond IB, Regan FM, Wedgwood K, Fey RE, Caul EO. A school outbreak of Norwalk-like virus: evidence for airborne transmission. *Epidemiol Infect*. 2003; 131(1):727–36. PMID: [12948373](https://pubmed.ncbi.nlm.nih.gov/12948373/); PubMed Central PMCID: PMC2870014.
15. Patterson W, Haswell P, Fryers PT, Green J. Outbreak of small round structured virus gastroenteritis arose after kitchen assistant vomited. *Commun Dis Rep CDR Rev*. 1997; 7(7):R101–3. PMID: [9219424](https://pubmed.ncbi.nlm.nih.gov/9219424/).
16. Petrignani M, van Beek J, Borsboom G, Richardus JH, Koopmans M. Norovirus introduction routes into nursing homes and risk factors for spread: a systematic review and meta-analysis of observational studies. *J Hosp Infect*. 2015; 89(3):163–78. doi: [10.1016/j.jhin.2014.11.015](https://doi.org/10.1016/j.jhin.2014.11.015) WOS:000349463300002. PMID: [25601744](https://pubmed.ncbi.nlm.nih.gov/25601744/)
17. Repp KK, Keene WE. A point-source norovirus outbreak caused by exposure to fomites. *J Infect Dis*. 2012; 205(11):1639–41. doi: [10.1093/infdis/jis250](https://doi.org/10.1093/infdis/jis250) PMID: [22573873](https://pubmed.ncbi.nlm.nih.gov/22573873/); PubMed Central PMCID: PMC3415849.
18. Wiksw ME, Cortes J, Hall AJ, Vaughan G, Howard C, Gregoricus N, et al. Disease transmission and passenger behaviors during a high morbidity Norovirus outbreak on a cruise ship, January 2009. *Clin Infect Dis*. 2011; 52(9):1116–22. doi: [10.1093/cid/cir144](https://doi.org/10.1093/cid/cir144) PMID: [21429864](https://pubmed.ncbi.nlm.nih.gov/21429864/).
19. Evans MR, Meldrum R, Lane W, Gardner D, Ribeiro CD, Gallimore CI, et al. An outbreak of viral gastroenteritis following environmental contamination at a concert hall. *Epidemiology and Infection*. 2002; 129(2):355–60. WOS:000178876800014. PMID: [12403111](https://pubmed.ncbi.nlm.nih.gov/12403111/)
20. Magill-Collins A, Gaither M, Gerba CP, Kitajima M, Iker BC, Stoehr JD. Norovirus Outbreaks Among Colorado River Rafters in the Grand Canyon, Summer 2012. *Wilderness Environ Med*. 2015. doi: [10.1016/j.wem.2015.02.007](https://doi.org/10.1016/j.wem.2015.02.007) PMID: [25890859](https://pubmed.ncbi.nlm.nih.gov/25890859/).
21. Atmar RL, Opekun AR, Gilger MA, Estes MK, Crawford SE, Neill FH, et al. Determination of the 50% human infectious dose for Norwalk virus. *J Infect Dis*. 2014; 209(7):1016–22. doi: [10.1093/infdis/jit620](https://doi.org/10.1093/infdis/jit620) PMID: [24253285](https://pubmed.ncbi.nlm.nih.gov/24253285/); PubMed Central PMCID: PMC3952671.
22. Leon JS, Kingsley DH, Montes JS, Richards GP, Lyon GM, Abdulhafid GM, et al. Randomized, double-blinded clinical trial for human norovirus inactivation in oysters by high hydrostatic pressure processing. *Appl Environ Microbiol*. 2011; 77(15):5476–82. doi: [10.1128/AEM.02801-10](https://doi.org/10.1128/AEM.02801-10) PMID: [21705552](https://pubmed.ncbi.nlm.nih.gov/21705552/); PubMed Central PMCID: PMC3147477.
23. Lindesmith L, Moe C, Lependu J, Frelinger JA, Treanor J, Baric RS. Cellular and humoral immunity following Snow Mountain virus challenge. *J Virol*. 2005; 79(5):2900–9. doi: [10.1128/JVI.79.5.2900-2909.2005](https://doi.org/10.1128/JVI.79.5.2900-2909.2005) PMID: [15709009](https://pubmed.ncbi.nlm.nih.gov/15709009/); PubMed Central PMCID: PMC548455.
24. Seitz SR, Leon JS, Schwab KJ, Lyon GM, Dowd M, McDaniels M, et al. Norovirus infectivity in humans and persistence in water. *Appl Environ Microbiol*. 2011; 77(19):6884–8. doi: [10.1128/AEM.05806-11](https://doi.org/10.1128/AEM.05806-11) PMID: [21856841](https://pubmed.ncbi.nlm.nih.gov/21856841/); PubMed Central PMCID: PMC3187119.

25. Kirby AE, Shi J, Montes J, Lichtenstein M, Moe CL. Disease course and viral shedding in experimental Norwalk virus and Snow Mountain virus infection. *J Med Virol*. 2014; 86(12):2055–64. doi: [10.1002/jmv.23905](https://doi.org/10.1002/jmv.23905) PMID: [24531909](https://pubmed.ncbi.nlm.nih.gov/24531909/).
26. Liu P, Hsiao HM, Jaykus LA, Moe C. Quantification of Norwalk virus inocula: Comparison of endpoint titration and real-time reverse transcription-PCR methods. *J Med Virol*. 2010; 82(9):1612–6. doi: [10.1002/jmv.21851](https://doi.org/10.1002/jmv.21851) PMID: [20648618](https://pubmed.ncbi.nlm.nih.gov/20648618/).
27. Armstrong D. Review article: gastric pH—the most relevant predictor of benefit in reflux disease? *Aliment Pharmacol Ther*. 2004; 20 Suppl 5:19–26; discussion 38–9. doi: [10.1111/j.1365-2036.2004.02140.x](https://doi.org/10.1111/j.1365-2036.2004.02140.x) PMID: [15456460](https://pubmed.ncbi.nlm.nih.gov/15456460/).
28. Teunis PF, Moe CL, Liu P, Miller SE, Lindesmith L, Baric RS, et al. Norwalk virus: how infectious is it? *J Med Virol*. 2008; 80(8):1468–76. doi: [10.1002/jmv.21237](https://doi.org/10.1002/jmv.21237) PMID: [18551613](https://pubmed.ncbi.nlm.nih.gov/18551613/).
29. Makison Booth C. Vomiting Larry: a simulated vomiting system for assessing environmental contamination from projectile vomiting related to norovirus infection. *J Infect Prev*. 2014; 15(5):176–80. doi: [10.1177/1757177414545390](https://doi.org/10.1177/1757177414545390) PMID: [25419239](https://pubmed.ncbi.nlm.nih.gov/25419239/); PubMed Central PMCID: PMC4230971.
30. Morawska L. Droplet fate in indoor environments, or can we prevent the spread of infection? *Indoor Air*. 2006; 16(5):335–47. doi: [10.1111/j.1600-0668.2006.00432.x](https://doi.org/10.1111/j.1600-0668.2006.00432.x) PMID: [16948710](https://pubmed.ncbi.nlm.nih.gov/16948710/).
31. Tung-Thompson G, Gentry-Shields J, Fraser A, Jaykus LA. Persistence of human norovirus RT-qPCR signals in simulated gastric fluid. *Food Environ Virol*. 2015; 7(1):32–40. doi: [10.1007/s12560-014-9170-4](https://doi.org/10.1007/s12560-014-9170-4) PMID: [25344785](https://pubmed.ncbi.nlm.nih.gov/25344785/).
32. Chan MC, Ho WS, Sung JJ. In vitro whole-virus binding of a norovirus genogroup II genotype 4 strain to cells of the lamina propria and Brunner's glands in the human duodenum. *J Virol*. 2011; 85(16):8427–30. doi: [10.1128/JVI.05016-11](https://doi.org/10.1128/JVI.05016-11) PMID: [21680503](https://pubmed.ncbi.nlm.nih.gov/21680503/); PubMed Central PMCID: PMC3147981.
33. Karst SM, Wobus CE. A working model of how noroviruses infect the intestine. *PLoS Pathog*. 2015; 11(2):e1004626. doi: [10.1371/journal.ppat.1004626](https://doi.org/10.1371/journal.ppat.1004626) PMID: [25723501](https://pubmed.ncbi.nlm.nih.gov/25723501/); PubMed Central PMCID: PMC4344369.
